# Supplementary material for: Extensive comparison of biodiesel production alternatives with life cycle, PESTLE and multi-criteria decision analyses
Source: Springer Nature journal article supplement (doi:10.1007/s10098-018-1527-1), 2018-04-20
Supplement: MOESM1 [file 15711206]

Table 1: Rapeseed biodiesel, IMPACT 2002+ v2.13 (Cut-off:0.063%)

| **No** | **Process** | **Unit** | **Total** |
| --- | --- | --- | --- |
|  | Total of all processes | mPt | 2,130954 |
|  | Remaining processes | mPt | 0,083132 |
| 1 | Rape seed, Swiss integrated production {CH}| rape seed production, Swiss integrated production, intensive | Alloc Rec, U | mPt | 1,145252 |
| 2 | Rape seed, Swiss integrated production {CH}| rape seed production, Swiss integrated production, extensive | Alloc Rec, U | mPt | 0,523815 |
| 3 | Rape seed, organic {RoW}| production | Alloc Rec, U | mPt | 0,050313 |
| 4 | Combine harvesting {CH}| processing | Alloc Rec, U | mPt | 0,039037 |
| 5 | Tillage, ploughing {CH}| processing | Alloc Rec, U | mPt | 0,029692 |
| 6 | Fertilising, by broadcaster {CH}| processing | Alloc Rec, U | mPt | 0,02183 |
| 7 | Nitric acid, without water, in 50% solution state {RoW}| nitric acid production, product in 50% solution state | Alloc Rec, U | mPt | 0,017048 |
| 8 | Natural gas, high pressure {RoW}| natural gas production | Alloc Rec, U | mPt | 0,016877 |
| 9 | Petroleum {RoW}| petroleum and gas production, on-shore | Alloc Rec, U | mPt | 0,011669 |
| 10 | Petroleum {RME}| production, onshore | Alloc Rec, U | mPt | 0,011535 |
| 11 | Tillage, harrowing, by spring tine harrow {CH}| processing | Alloc Rec, U | mPt | 0,01132 |
| 12 | Natural gas, high pressure {US}| natural gas production | Alloc Rec, U | mPt | 0,010937 |
| 13 | Uranium, in yellowcake {GLO}| uranium production, in yellowcake, in-situ leaching | Alloc Rec, U | mPt | 0,009871 |
| 14 | Natural gas, high pressure {RU}| natural gas production | Alloc Rec, U | mPt | 0,008836 |
| 15 | Nitric acid, without water, in 50% solution state {RER}| nitric acid production, product in 50% solution state | Alloc Rec, U | mPt | 0,008419 |
| 16 | Application of plant protection product, by field sprayer {CH}| processing | Alloc Rec, U | mPt | 0,008384 |
| 17 | Ammonia, liquid {RoW}| ammonia production, steam reforming, liquid | Alloc Rec, U | mPt | 0,00724 |
| 18 | Natural gas, unprocessed, at extraction {GLO}| production | Alloc Rec, U | mPt | 0,00619 |
| 19 | Uranium ore, as U {RNA}| uranium mine operation, underground | Alloc Rec, U | mPt | 0,005777 |
| 20 | Sowing {CH}| processing | Alloc Rec, U | mPt | 0,005765 |
| 21 | Drying of bread grain, seed and legumes {CH}| processing | Alloc Rec, U | mPt | 0,005471 |
| 22 | Uranium ore, as U {RoW}| uranium mine operation, underground | Alloc Rec, U | mPt | 0,005454 |
| 23 | Solid manure loading and spreading, by hydraulic loader and spreader {CH}| processing | Alloc Rec, U | mPt | 0,005124 |
| 24 | Petroleum {RU}| production, onshore | Alloc Rec, U | mPt | 0,005036 |
| 25 | Liquid manure spreading, by vacuum tanker {CH}| processing | Alloc Rec, U | mPt | 0,004819 |
| 26 | Petroleum {RoW}| petroleum and gas production, off-shore | Alloc Rec, U | mPt | 0,004767 |
| 27 | Natural gas, high pressure {US}| petroleum and gas production, on-shore | Alloc Rec, U | mPt | 0,004279 |
| 28 | Ammonia, liquid {RER}| ammonia production, steam reforming, liquid | Alloc Rec, U | mPt | 0,004275 |
| 29 | Electricity, high voltage {IN}| electricity production, lignite | Alloc Rec, U | mPt | 0,004261 |
| 30 | Transport, tractor and trailer, agricultural {RoW}| processing | Alloc Rec, U | mPt | 0,003263 |
| 31 | Ammonia, liquid {RoW}| ammonia production, partial oxidation, liquid | Alloc Rec, U | mPt | 0,00325 |
| 32 | Irrigation {CH}| processing | Alloc Rec, U | mPt | 0,002789 |
| 33 | Acetamide-anillide-compound, unspecified {RoW}| production | Alloc Rec, U | mPt | 0,002525 |
| 34 | Natural gas, high pressure {RoW}| petroleum and gas production, on-shore | Alloc Rec, U | mPt | 0,002452 |
| 35 | Tyre wear emissions, lorry {RoW}| treatment of | Alloc Rec, U | mPt | 0,002433 |
| 36 | Hard coal {CN}| mine operation | Alloc Rec, U | mPt | 0,002397 |
| 37 | Waste natural gas, sour {GLO}| treatment of, burned in production flare | Alloc Rec, U | mPt | 0,002321 |
| 38 | Natural gas, high pressure {NO}| petroleum and gas production, off-shore | Alloc Rec, U | mPt | 0,00231 |
| 39 | Uranium ore, as U {RoW}| uranium mine operation, open cast | Alloc Rec, U | mPt | 0,002152 |
| 40 | Sweet gas, burned in gas turbine {RoW}| processing | Alloc Rec, U | mPt | 0,002143 |
| 41 | Polyethylene, high density, granulate {RoW}| production | Alloc Rec, U | mPt | 0,002139 |
| 42 | Rape seed {Canada without Quebec}| rape seed production | Alloc Rec, U | mPt | 0,001969 |
| 43 | Ammonia, liquid {RER}| ammonia production, partial oxidation, liquid | Alloc Rec, U | mPt | 0,001919 |
| 44 | Heat, district or industrial, other than natural gas {RoW}| heat production, at hard coal industrial furnace 1-10MW | Alloc Rec, U | mPt | 0,001855 |
| 45 | Transport, freight, sea, transoceanic ship {GLO}| processing | Alloc Rec, U | mPt | 0,001802 |
| 46 | Transport, freight, lorry 16-32 metric ton, EURO3 {RoW}| transport, freight, lorry 16-32 metric ton, EURO3 | Alloc Rec, U | mPt | 0,001657 |
| 47 | Natural gas, high pressure {RoW}| petroleum and gas production, off-shore | Alloc Rec, U | mPt | 0,001627 |
| 48 | Natural gas, high pressure {CA-AB}| natural gas production | Alloc Rec, U | mPt | 0,001599 |
| 49 | Electricity, high voltage {ID}| electricity production, lignite | Alloc Rec, U | mPt | 0,001564 |
| 50 | Transport, freight, lorry >32 metric ton, EURO3 {RoW}| transport, freight, lorry >32 metric ton, EURO3 | Alloc Rec, U | mPt | 0,001528 |
| 51 | Petroleum {RoW}| production, onshore | Alloc Rec, U | mPt | 0,001522 |
| 52 | Uranium ore, as U {RNA}| uranium mine operation, open cast | Alloc Rec, U | mPt | 0,001501 |
| 53 | Waste natural gas, sweet {GLO}| treatment of, burned in production flare | Alloc Rec, U | mPt | 0,001474 |
| 54 | Heat, district or industrial, natural gas {RU}| heat and power co-generation, natural gas, conventional power plant, 100MW electrical | Alloc Rec, U | mPt | 0,001469 |
| 55 | Natural gas, high pressure {NL}| petroleum and gas production, on-shore | Alloc Rec, U | mPt | 0,001451 |
| 56 | Natural gas, high pressure {DZ}| natural gas production | Alloc Rec, U | mPt | 0,001415 |

Table 2: Soybean biodiesel, IMPACT 2002+ v2.13 (Cut-off:0.063%)

| **No** | **Process** | **Unit** | **Total** |
| --- | --- | --- | --- |
|  | Total of all processes | mPt | 1,557335 |
| 1 | Land tenure, arable land, measured as carbon net primary productivity, annual crop {AR}| clear-cutting, secondary forest to arable land, annual crop | Alloc Def, U | mPt | 0,47023 |
| 2 | Land tenure, arable land, measured as carbon net primary productivity, annual crop {BR}| clear-cutting, primary forest to arable land, annual crop | Alloc Def, U | mPt | 0,4073031 |
| 3 | Soybean {US}| production | Alloc Def, U | mPt | 0,1632416 |
| 4 | Soybean {RoW}| production | Alloc Def, U | mPt | 0,1126481 |
| 5 | Remaining processes | mPt | 0,0713871 |
| 6 | Land use change, annual crop {BR}| land use change, annual crop | Alloc Def, U | mPt | 0,0490228 |
| 7 | Land tenure, arable land, measured as carbon net primary productivity, annual crop {AR}| clear-cutting, primary forest to arable land, annual crop | Alloc Def, U | mPt | 0,0420438 |
| 8 | Land tenure, arable land, measured as carbon net primary productivity, annual crop {BR}| clear-cutting, secondary forest to arable land, annual crop | Alloc Def, U | mPt | 0,0224721 |
| 9 | Combine harvesting {RoW}| processing | Alloc Def, U | mPt | 0,0192664 |
| 10 | Land use change, annual crop {AR}| land use change, annual crop | Alloc Def, U | mPt | 0,0177491 |
| 11 | Natural gas, high pressure {RoW}| natural gas production | Alloc Def, U | mPt | 0,0146982 |
| 12 | Transport, freight, sea, transoceanic ship {GLO}| processing | Alloc Def, U | mPt | 0,0142705 |
| 13 | Diesel, burned in building machine {GLO}| processing | Alloc Def, U | mPt | 0,0113879 |
| 14 | Heat, district or industrial, other than natural gas {RoW}| heat production, at hard coal industrial furnace 1-10MW | Alloc Def, U | mPt | 0,0104137 |
| 15 | Natural gas, high pressure {US}| natural gas production | Alloc Def, U | mPt | 0,0096452 |
| 16 | Petroleum {RoW}| petroleum and gas production, on-shore | Alloc Def, U | mPt | 0,0095824 |
| 17 | Petroleum {RME}| production, onshore | Alloc Def, U | mPt | 0,0094729 |
| 18 | Sulfuric acid {RoW}| production | Alloc Def, U | mPt | 0,0071576 |
| 19 | Tillage, ploughing {RoW}| processing | Alloc Def, U | mPt | 0,0067981 |
| 20 | Natural gas, high pressure {RU}| natural gas production | Alloc Def, U | mPt | 0,0064105 |
| 21 | H3PO4 purification residue {RoW}| treatment of H3PO4 purification residue, residual material landfill | Alloc Def, U | mPt | 0,0063076 |
| 22 | Natural gas, unprocessed, at extraction {GLO}| production | Alloc Def, U | mPt | 0,0053913 |
| 23 | Application of plant protection product, by field sprayer {RoW}| processing | Alloc Def, U | mPt | 0,0051669 |
| 24 | Sowing {RoW}| processing | Alloc Def, U | mPt | 0,0048535 |
| 25 | Electricity, high voltage {IN}| electricity production, lignite | Alloc Def, U | mPt | 0,0046928 |
| 26 | Hard coal {CN}| mine operation | Alloc Def, U | mPt | 0,0044962 |
| 27 | Fertilising, by broadcaster {RoW}| processing | Alloc Def, U | mPt | 0,0044439 |
| 28 | Petroleum {RU}| production, onshore | Alloc Def, U | mPt | 0,0041354 |
| 29 | Heat, district or industrial, natural gas {RU}| heat and power co-generation, natural gas, conventional power plant, 100MW electrical | Alloc Def, U | mPt | 0,004092 |
| 30 | Tillage, harrowing, by spring tine harrow {RoW}| processing | Alloc Def, U | mPt | 0,0039895 |
| 31 | Petroleum {RoW}| petroleum and gas production, off-shore | Alloc Def, U | mPt | 0,0039151 |
| 32 | Natural gas, high pressure {US}| petroleum and gas production, on-shore | Alloc Def, U | mPt | 0,0037739 |
| 33 | Sugarcane {BR}| production | Alloc Def, U | mPt | 0,0033436 |
| 34 | Transport, tractor and trailer, agricultural {RoW}| processing | Alloc Def, U | mPt | 0,0032302 |
| 35 | Land tenure, arable land, measured as carbon net primary productivity, annual crop {BR}| land already in use, perennial cropland to annual crop | Alloc Def, U | mPt | 0,0029372 |
| 36 | Electricity, high voltage {RFC}| electricity production, lignite | Alloc Def, U | mPt | 0,0025747 |
| 37 | Tyre wear emissions, lorry {RoW}| treatment of | Alloc Def, U | mPt | 0,0024508 |
| 38 | Phosphate rock, as P2O5, beneficiated, wet {RoW}| phosphate rock beneficiation, wet | Alloc Def, U | mPt | 0,0023853 |
| 39 | Phosphoric acid, fertiliser grade, without water, in 70% solution state {RoW}| phosphoric acid production, dihydrate process | Alloc Def, U | mPt | 0,0022714 |
| 40 | Electricity, high voltage {SERC}| electricity production, lignite | Alloc Def, U | mPt | 0,0022647 |
| 41 | Electricity, high voltage {BR}| electricity production, lignite | Alloc Def, U | mPt | 0,0021437 |
| 42 | Natural gas, high pressure {RoW}| petroleum and gas production, on-shore | Alloc Def, U | mPt | 0,0021354 |
| 43 | Heat, district or industrial, natural gas {RoW}| heat and power co-generation, natural gas, conventional power plant, 100MW electrical | Alloc Def, U | mPt | 0,0020413 |
| 44 | Waste natural gas, sour {GLO}| treatment of, burned in production flare | Alloc Def, U | mPt | 0,0019039 |
| 45 | Electricity, high voltage {ID}| electricity production, lignite | Alloc Def, U | mPt | 0,0018337 |
| 46 | Hard coal {RoW}| mine operation | Alloc Def, U | mPt | 0,0017771 |
| 47 | Sweet gas, burned in gas turbine {RoW}| processing | Alloc Def, U | mPt | 0,0017555 |
| 48 | Sulfuric acid {RER}| production | Alloc Def, U | mPt | 0,0017221 |
| 49 | Transport, freight, lorry 16-32 metric ton, EURO3 {RoW}| transport, freight, lorry 16-32 metric ton, EURO3 | Alloc Def, U | mPt | 0,0016686 |
| 50 | Transport, freight, lorry >32 metric ton, EURO3 {RoW}| transport, freight, lorry >32 metric ton, EURO3 | Alloc Def, U | mPt | 0,0015392 |
| 51 | Natural gas, high pressure {RoW}| petroleum and gas production, off-shore | Alloc Def, U | mPt | 0,0014165 |
| 52 | Natural gas, high pressure {CA-AB}| natural gas production | Alloc Def, U | mPt | 0,0013615 |
| 53 | Natural gas, high pressure {NO}| petroleum and gas production, off-shore | Alloc Def, U | mPt | 0,0012873 |
| 54 | Transport, freight train {US}| diesel | Alloc Def, U | mPt | 0,0012832 |
| 55 | Petroleum {RoW}| production, onshore | Alloc Def, U | mPt | 0,0012501 |
| 56 | Waste natural gas, sweet {GLO}| treatment of, burned in production flare | Alloc Def, U | mPt | 0,0012135 |
| 57 | Heavy fuel oil, burned in refinery furnace {RoW}| processing | Alloc Def, U | mPt | 0,0011937 |
| 58 | Natural gas, high pressure {US}| market for | Alloc Def, U | mPt | 0,0011819 |
| 59 | Phosphoric acid, fertiliser grade, without water, in 70% solution state {US}| phosphoric acid production, dihydrate process | Alloc Def, U | mPt | 0,0011514 |
| 60 | Lignite {RoW}| mine operation | Alloc Def, U | mPt | 0,001142 |
| 61 | Electricity, high voltage {WECC, US only}| electricity production, lignite | Alloc Def, U | mPt | 0,0010587 |
| 62 | Quicklime, in pieces, loose {RoW}| production | Alloc Def, U | mPt | 0,0010298 |
| 63 | Transport, freight, lorry >32 metric ton, EURO4 {RoW}| transport, freight, lorry >32 metric ton, EURO4 | Alloc Def, U | mPt | 0,0010075 |
| 64 | Transport, freight, lorry 16-32 metric ton, EURO4 {RoW}| transport, freight, lorry 16-32 metric ton, EURO4 | Alloc Def, U | mPt | 0,0010056 |
| 65 | Natural gas, high pressure {DZ}| natural gas production | Alloc Def, U | mPt | 0,0009986 |
| 66 | Tyre wear emissions, lorry {RER}| treatment of | Alloc Def, U | mPt | 0,0009961 |
| 67 | Diesel, burned in diesel-electric generating set, 10MW {GLO}| diesel, burned in diesel-electric generating set, 10MW | Alloc Def, U | mPt | 0,0009851 |
| 68 | Soybean {CA-QC}| production | Alloc Def, U | mPt | -0,003047 |
| 69 | Soybean {AR}| soybean production | Alloc Def, U | mPt | -0,0072 |
| 70 | Soybean {BR}| production | Alloc Def, U | mPt | -0,022418 |

Table 3: Palm biodiesel, IMPACT 2002+ v2.13 (Cut-off:0.063%)

| **No** | **Process** | **Unit** | **Total** |
| --- | --- | --- | --- |
|  | Total of all processes | µPt | 573,5017 |
| 1 | Palm fruit bunch {MY}| production | Alloc Rec, U | µPt | 114,7071 |
| 2 | Land tenure, arable land, measured as carbon net primary productivity, perennial crop {MY}| clear-cutting, secondary forest to arable land, perennial crop | Alloc Rec, U | µPt | 80,27433 |
| 3 | Palm oil, crude {MY}| palm oil mill operation | Alloc Rec, U | µPt | 77,58017 |
| 4 | Palm fruit bunch {RoW}| production | Alloc Rec, U | µPt | 54,93428 |
| 5 | Wood ash mixture, pure {RoW}| treatment of wood ash mixture, pure, landfarming | Alloc Rec, U | µPt | 53,69878 |
| 6 | Land tenure, arable land, measured as carbon net primary productivity, perennial crop {MY}| clear-cutting, primary forest to arable land, perennial crop | Alloc Rec, U | µPt | 28,84602 |
|  | Remaining processes | µPt | 28,01772 |
| 7 | Land tenure, arable land, measured as carbon net primary productivity, perennial crop {ID}| clear-cutting, primary forest to arable land, perennial crop | Alloc Rec, U | µPt | 14,86807 |
| 8 | Natural gas, high pressure {RoW}| natural gas production | Alloc Rec, U | µPt | 13,01238 |
| 9 | Land tenure, arable land, measured as carbon net primary productivity, perennial crop {ID}| clear-cutting, secondary forest to arable land, perennial crop | Alloc Rec, U | µPt | 9,296188 |
| 10 | Electricity, high voltage {MY}| electricity production, hard coal | Alloc Rec, U | µPt | 7,817477 |
| 11 | Natural gas, high pressure {US}| natural gas production | Alloc Rec, U | µPt | 7,793586 |
| 12 | Transport, tractor and trailer, agricultural {RoW}| processing | Alloc Rec, U | µPt | 7,659851 |
| 13 | Electricity, high voltage {IN}| electricity production, lignite | Alloc Rec, U | µPt | 6,88376 |
| 14 | Natural gas, high pressure {RU}| natural gas production | Alloc Rec, U | µPt | 5,65076 |
| 15 | Palm fruit bunch {ID}| palm fruit bunch production | Alloc Rec, U | µPt | 4,782062 |
| 16 | Natural gas, unprocessed, at extraction {GLO}| production | Alloc Rec, U | µPt | 4,77296 |
| 17 | Natural gas, high pressure {US}| petroleum and gas production, on-shore | Alloc Rec, U | µPt | 3,049495 |
| 18 | Heat, district or industrial, natural gas {RU}| heat and power co-generation, natural gas, conventional power plant, 100MW electrical | Alloc Rec, U | µPt | 2,494492 |
| 19 | Land use change, perennial crop {MY}| land use change, perennial crop | Alloc Rec, U | µPt | 2,177577 |
| 20 | Heat, district or industrial, other than natural gas {RoW}| heat production, at hard coal industrial furnace 1-10MW | Alloc Rec, U | µPt | 2,096959 |
| 21 | Petroleum {RoW}| petroleum and gas production, on-shore | Alloc Rec, U | µPt | 2,067722 |
| 22 | Petroleum {RME}| production, onshore | Alloc Rec, U | µPt | 2,043959 |
| 23 | Natural gas, high pressure {RoW}| petroleum and gas production, on-shore | Alloc Rec, U | µPt | 1,890601 |
| 24 | Hard coal {CN}| mine operation | Alloc Rec, U | µPt | 1,843407 |
| 25 | Diesel, burned in building machine {GLO}| processing | Alloc Rec, U | µPt | 1,82567 |
| 26 | Wastewater, from residence {RoW}| treatment of, capacity 1.1E10l/year | Alloc Rec, U | µPt | 1,509432 |
| 27 | Land use change, perennial crop {ID}| land use change, perennial crop | Alloc Rec, U | µPt | 1,476777 |
| 28 | Electricity, high voltage {IN}| electricity production, hard coal | Alloc Rec, U | µPt | 1,283996 |
| 29 | Fertilising, by broadcaster {RoW}| processing | Alloc Rec, U | µPt | 1,280469 |
| 30 | Electricity, high voltage {ID}| electricity production, lignite | Alloc Rec, U | µPt | 1,274994 |
| 31 | Natural gas, high pressure {RoW}| petroleum and gas production, off-shore | Alloc Rec, U | µPt | 1,254064 |
| 32 | Heat, district or industrial, natural gas {RoW}| heat and power co-generation, natural gas, conventional power plant, 100MW electrical | Alloc Rec, U | µPt | 1,244365 |
| 33 | Diesel, burned in agricultural machinery {GLO}| diesel, burned in agricultural machinery | Alloc Rec, U | µPt | 1,232387 |
| 34 | Hard coal {RoW}| mine operation | Alloc Rec, U | µPt | 1,219295 |
| 35 | Natural gas, high pressure {CA-AB}| natural gas production | Alloc Rec, U | µPt | 1,170015 |
| 36 | Natural gas, high pressure {NO}| petroleum and gas production, off-shore | Alloc Rec, U | µPt | 1,165565 |
| 37 | Wood chipping, chipper, mobile, diesel, at forest road {RoW}| wood chipping, mobile chipper, at forest road | Alloc Rec, U | µPt | 1,11714 |
| 38 | Hard coal {ID}| mine operation | Alloc Rec, U | µPt | 1,02397 |
| 39 | Natural gas, high pressure {US}| market for | Alloc Rec, U | µPt | 0,95503 |
| 40 | Sweet gas, burned in gas turbine {RoW}| processing | Alloc Rec, U | µPt | 0,910936 |
| 41 | Transport, freight, sea, transoceanic ship {GLO}| processing | Alloc Rec, U | µPt | 0,903844 |
| 42 | Natural gas, high pressure {DZ}| natural gas production | Alloc Rec, U | µPt | 0,900227 |
| 43 | Petroleum {RU}| production, onshore | Alloc Rec, U | µPt | 0,892289 |
| 44 | Electricity, high voltage {RFC}| electricity production, lignite | Alloc Rec, U | µPt | 0,863749 |
| 45 | Petroleum {RoW}| petroleum and gas production, off-shore | Alloc Rec, U | µPt | 0,844756 |
| 46 | Polyethylene, high density, granulate {RoW}| production | Alloc Rec, U | µPt | 0,829317 |
| 47 | Electricity, high voltage {SERC}| electricity production, lignite | Alloc Rec, U | µPt | 0,759135 |
| 48 | Electricity, high voltage {MY}| electricity production, natural gas, combined cycle power plant | Alloc Rec, U | µPt | 0,658879 |
| 49 | Sulfuric acid {RoW}| production | Alloc Rec, U | µPt | 0,656656 |
| 50 | Natural gas, high pressure {NL}| petroleum and gas production, on-shore | Alloc Rec, U | µPt | 0,647541 |
| 51 | Electricity, high voltage {RU}| heat and power co-generation, lignite | Alloc Rec, U | µPt | 0,620069 |
| 52 | Sour gas, burned in gas turbine {RoW}| processing | Alloc Rec, U | µPt | 0,610436 |
| 53 | Natural gas, high pressure {GB}| petroleum and gas production, off-shore | Alloc Rec, U | µPt | 0,599318 |
| 54 | Tyre wear emissions, lorry {RoW}| treatment of | Alloc Rec, U | µPt | 0,577227 |
| 55 | Electricity, high voltage {MY}| electricity production, natural gas, conventional power plant | Alloc Rec, U | µPt | 0,564276 |
| 56 | Heat, district or industrial, other than natural gas {Europe without Switzerland}| heat production, at hard coal industrial furnace 1-10MW | Alloc Rec, U | µPt | 0,531166 |
| 57 | Lignite {RoW}| mine operation | Alloc Rec, U | µPt | 0,516998 |
| 58 | Irrigation {MY}| processing | Alloc Rec, U | µPt | 0,478875 |
| 59 | Heat, district or industrial, natural gas {RoW}| heat and power co-generation, natural gas, 1MW electrical, lean burn | Alloc Rec, U | µPt | 0,460765 |
| 60 | Waste natural gas, sweet {GLO}| treatment of, burned in production flare | Alloc Rec, U | µPt | 0,444841 |
| 61 | Waste natural gas, sour {GLO}| treatment of, burned in production flare | Alloc Rec, U | µPt | 0,441077 |
| 62 | Ammonium sulfate, as N {GLO}| nickel mine operation, sulfidic ore | Alloc Rec, U | µPt | 0,424259 |
| 63 | Natural gas, high pressure {DE}| natural gas production | Alloc Rec, U | µPt | 0,414191 |
| 64 | Polyethylene, high density, granulate {RER}| production | Alloc Rec, U | µPt | 0,409565 |
| 65 | Natural gas, burned in gas motor, for storage {RoW}| processing | Alloc Rec, U | µPt | 0,408193 |
| 66 | Hard coal {AU}| mine operation | Alloc Rec, U | µPt | 0,392631 |
| 67 | Electricity, high voltage, for internal use in coal mining {RoW}| electricity production, hard coal, at coal mine power plant | Alloc Rec, U | µPt | 0,384592 |
| 68 | Natural gas, high pressure {CA-AB}| petroleum and gas production, on-shore | Alloc Rec, U | µPt | 0,376417 |
| 69 | H3PO4 purification residue {RoW}| treatment of H3PO4 purification residue, residual material landfill | Alloc Rec, U | µPt | 0,374418 |
| 70 | Transport, freight, lorry 16-32 metric ton, EURO3 {RoW}| transport, freight, lorry 16-32 metric ton, EURO3 | Alloc Rec, U | µPt | 0,367376 |
| 71 | Land tenure, arable land, measured as carbon net primary productivity, perennial crop {MY}| land already in use, annual cropland to perennial crop | Alloc Rec, U | µPt | -0,53076 |
| 72 | Land use change, perennial crop {CO}| land use change, perennial crop | Alloc Rec, U | µPt | -0,70703 |
| 73 | Land tenure, arable land, measured as carbon net primary productivity, perennial crop {CO}| land already in use, annual cropland to perennial crop | Alloc Rec, U | µPt | -0,81742 |
